# Supplementary material for: Electrochemically regulated luminescence of europium complexes with β-diketone in polyether matrices
Source: Royal Society of Chemistry journal article supplement (doi:10.1039/d3cp02283h), 2023-01-01

## Supporting Information

### **Electrochemically Regulated Luminescence of Europium Complex with $\beta$ -diketone in Polyether Matrices**

Ryoto Yabuta, Norihisa Kobayashi, and Kazuki Nakamura

## Figure Captions

**Fig. S1.**

Cyclic voltammograms of  $\text{Eu}(\text{NO}_3)_3 \cdot 6(\text{H}_2\text{O})$  in DMSO, MeCN, and PC. ( $[\text{LiCF}_3\text{SO}_3] = 500 \text{ mM}$ ,  $[\text{Eu}(\text{NO}_3)_3 \cdot 6(\text{H}_2\text{O})] = 10 \text{ mM}$ )

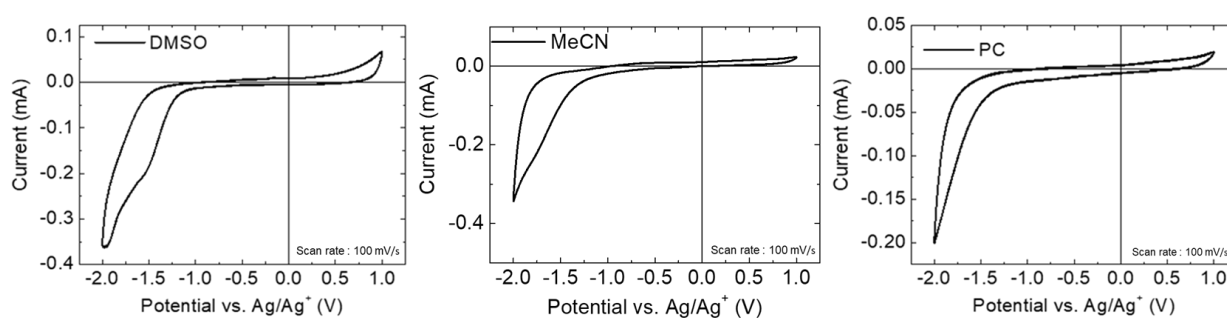

**Fig. S2.**

Emission spectra of the  $\text{Eu}(\text{NO}_3)_3 \cdot 6\text{H}_2\text{O}$  solution (DMSO, MeCN, or PC) in a three-electrode electrochemical cell with/without an applied reduction potential (-1.65 V). Excitation wavelength = 272 nm.

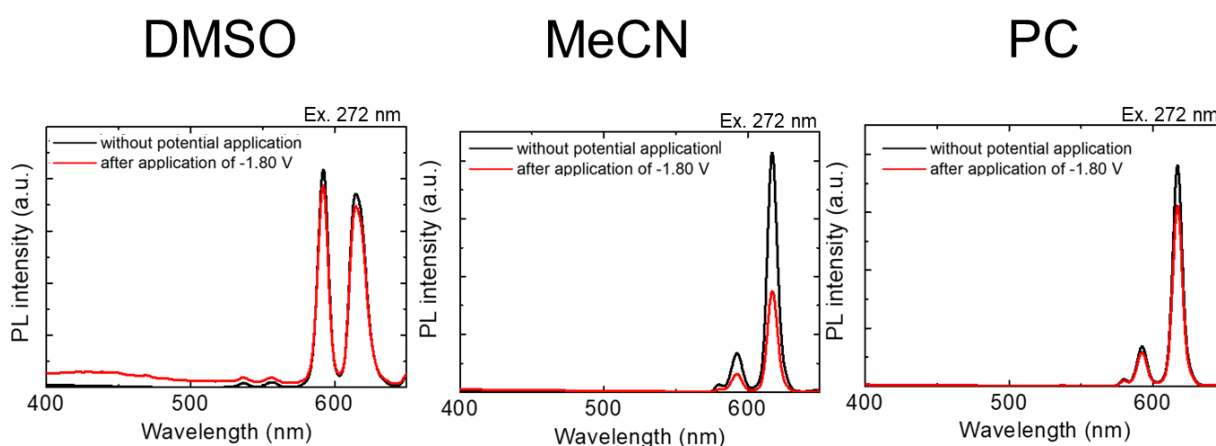

Fig. S3.

Emission spectra of the  $\text{Eu}(\text{hfa})_3(\text{H}_2\text{O})_2$  solution (MeCN) in a three-electrode electrochemical cell with/without an applied reduction potential (-1.80 V). Excitation wavelength = 365 nm.

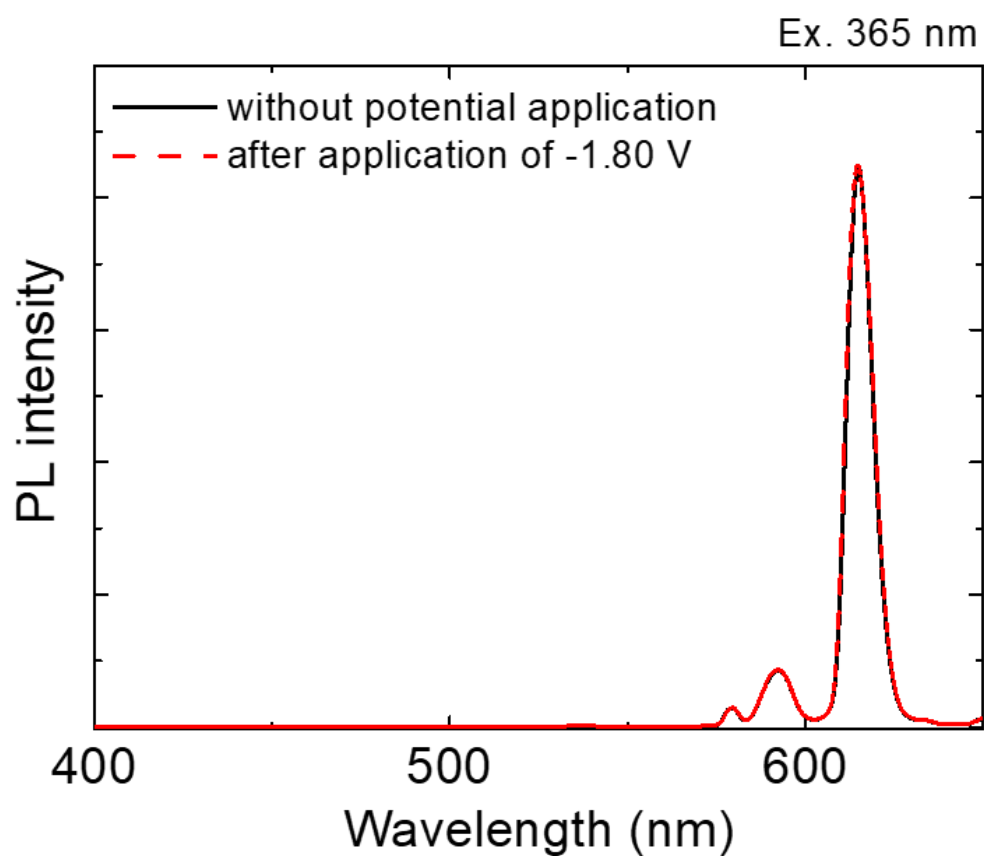

Supplement: d3cp02283h1.pdf [file d3cp02283h1.pdf]
